# Supplementary material for: Identification of small molecule inhibitors of RANKL and TNF signalling as anti-inflammatory and antiresorptive agents in mice
Source: HighWire-hosted journal article supplement (doi:10.1136/annrheumdis-2013-203700), 2013-10-05

**Supplementary Figure 1.** ABD compounds do not affect M-CSF and IFN $\gamma$  signalling Bone marrow macrophage cultures were serum starved and pretreated with compounds at 10  $\mu$ M for 1h. The cultures were stimulated with M-CSF (100 ng/ml, A), or IFN $\gamma$  (1000 U/ml, B) for 15 min and ERK (A,) and STAT1 (B) phosphorylation analysed by Western blotting.

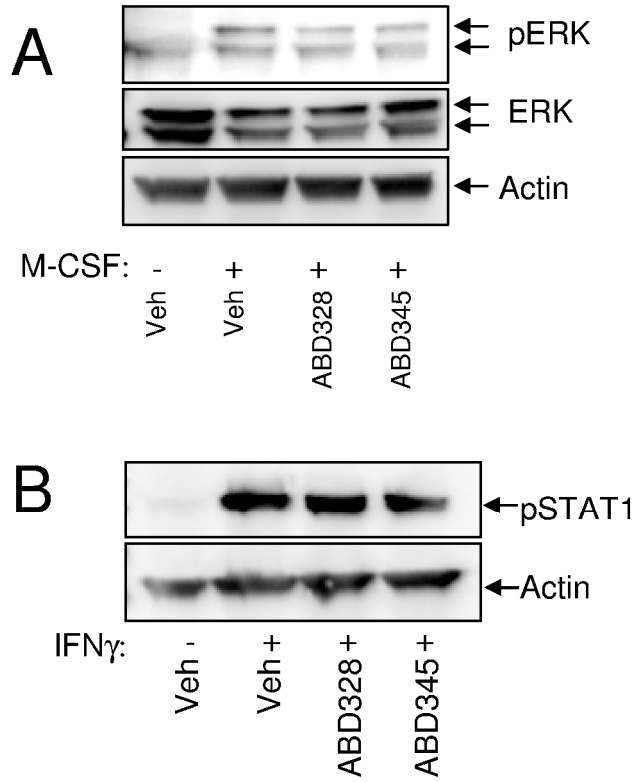

Supplement: annrheumdis-2013-203700supp_figures.pdf [file annrheumdis-2013-203700supp_figures.pdf]
